# Supplementary material for: Deep sequencing for de novo construction of a marine fish (Sparus aurata) transcriptome database with a large coverage of protein-coding transcripts
Source: PubMed Central journal article supplement (PMC3606596; doi:10.1186/1471-2164-14-178), 2013-03-15
Supplement: 1471-2164-14-178-S1.pdf [file 1471-2164-14-178-S1.pdf]

| <b>Canonical Pathway</b>                                     | <b>E-value</b> | <b>Ratio</b> |
|--------------------------------------------------------------|----------------|--------------|
| 14-3-3-mediated Signaling                                    | 4.90E-06       | 0.70         |
| 4-1BB Signaling in T Lymphocytes                             | 2.57E-03       | 0.68         |
| Actin Cytoskeleton Signaling                                 | 1.78E-09       | 0.65         |
| Actin Nucleation by ARP-WASP Complex                         | 1.29E-05       | 0.68         |
| Activation of IRF by Cytosolic Pattern Recognition Receptors | 8.13E-02       | 0.54         |
| Acute Myeloid Leukemia Signaling                             | 9.33E-07       | 0.74         |
| Acute Phase Response Signaling                               | 7.94E-12       | 0.73         |
| Agrin Interactions at Neuromuscular Junction                 | 2.88E-04       | 0.73         |
| Airway Inflammation in Asthma                                | ---            | ---          |
| Airway Pathology in Chronic Obstructive Pulmonary Disease    | 5.62E-03       | 0.89         |
| Alanine and Aspartate Metabolism                             | 9.55E-04       | 0.37         |
| Aldosterone Signaling in Epithelial Cells                    | 8.91E-09       | 0.67         |
| Allograft Rejection Signaling                                | ---            | ---          |
| Altered T Cell and B Cell Signaling in Rheumatoid Arthritis  | ---            | ---          |
| Aminoacyl-tRNA Biosynthesis                                  | 2.40E-06       | 0.40         |
| Aminophosphonate Metabolism                                  | 5.25E-02       | 0.30         |
| Aminosugars Metabolism                                       | 1.48E-03       | 0.41         |
| AMPK Signaling                                               | 9.33E-08       | 0.60         |
| Amyloid Processing                                           | 1.10E-04       | 0.71         |
| Amyotrophic Lateral Sclerosis Signaling                      | 1.55E-02       | 0.53         |
| Androgen and Estrogen Metabolism                             | 4.48E-01       | 0.33         |
| Androgen Signaling                                           | 1.62E-10       | 0.63         |
| Angiopoietin Signaling                                       | 3.47E-06       | 0.70         |
| Antigen Presentation Pathway                                 | 2.10E-01       | 0.56         |
| Antiproliferative Role of Somatostatin Receptor 2            | 8.51E-05       | 0.68         |
| Antiproliferative Role of TOB in T Cell Signaling            | 6.17E-04       | 0.85         |
| Apoptosis Signaling                                          | 4.68E-09       | 0.76         |
| April Mediated Signaling                                     | 2.14E-03       | 0.67         |
| Arginine and Proline Metabolism                              | 1.41E-02       | 0.27         |
| Aryl Hydrocarbon Receptor Signaling                          | 7.76E-05       | 0.59         |
| Ascorbate and Aldarate Metabolism                            | 2.40E-01       | 0.15         |
| Assembly of RNA Polymerase I Complex                         | 1.16E-01       | 0.54         |
| Assembly of RNA Polymerase II Complex                        | 1.23E-05       | 0.73         |
| Assembly of RNA Polymerase III Complex                       | 6.46E-02       | 0.63         |
| Atherosclerosis Signaling                                    | 5.24E-01       | 0.47         |
| ATM Signaling                                                | 2.34E-04       | 0.74         |
| Autoimmune Thyroid Disease Signaling                         | ---            | ---          |
| Axonal Guidance Signaling                                    | 6.61E-05       | 0.56         |
| B Cell Activating Factor Signaling                           | 9.55E-04       | 0.69         |
| B Cell Receptor Signaling                                    | 3.31E-07       | 0.67         |
| Basal Cell Carcinoma Signaling                               | ---            | ---          |
| Bile Acid Biosynthesis                                       | 1.91E-01       | 0.30         |
| Biosynthesis of Steroids                                     | 6.17E-02       | 0.12         |
| Bladder Cancer Signaling                                     | 4.27E-01       | 0.52         |
| BMP signaling pathway                                        | 9.77E-03       | 0.60         |
| Breast Cancer Regulation by Stathmin1                        | 1.26E-11       | 0.70         |
| Butanoate Metabolism                                         | 1.78E-03       | 0.33         |
| C21-Steroid Hormone Metabolism                               | ---            | ---          |
| Calcium Signaling                                            | 8.71E-04       | 0.54         |

|                                                              |          |      |
|--------------------------------------------------------------|----------|------|
| Calcium-induced T Lymphocyte Apoptosis                       | 6.17E-02 | 0.56 |
| cAMP-mediated signaling                                      | 3.44E-01 | 0.53 |
| Cardiac Hypertrophy Signaling                                | 5.13E-09 | 0.65 |
| Cardiac $\beta$ -adrenergic Signaling                        | 3.63E-05 | 0.60 |
| Cardiomyocyte Differentiation via BMP Receptors              | ---      | ---  |
| Caveolar-mediated Endocytosis Signaling                      | 5.62E-04 | 0.62 |
| CCR3 Signaling in Eosinophils                                | 3.47E-05 | 0.64 |
| CCR5 Signaling in Macrophages                                | 1.12E-02 | 0.49 |
| CD27 Signaling in Lymphocytes                                | 3.47E-04 | 0.68 |
| CD28 Signaling in T Helper Cells                             | 1.86E-05 | 0.63 |
| CD40 Signaling                                               | 1.20E-07 | 0.76 |
| Cdc42 Signaling                                              | 2.75E-02 | 0.54 |
| CDK5 Signaling                                               | 5.37E-06 | 0.70 |
| Cell Cycle Control of Chromosomal Replication                | 4.47E-02 | 0.61 |
| Cell Cycle Regulation by BTG Family Proteins                 | 6.76E-04 | 0.78 |
| Cell Cycle: G1/S Checkpoint Regulation                       | 4.27E-04 | 0.69 |
| Cell Cycle: G2/M DNA Damage Checkpoint Regulation            | 1.78E-03 | 0.67 |
| Cellular Effects of Sildenafil (Viagra)                      | 3.09E-02 | 0.53 |
| Ceramide Signaling                                           | 2.00E-09 | 0.76 |
| Chemokine Signaling                                          | 5.13E-04 | 0.69 |
| Cholecystokinin/Gastrin-mediated Signaling                   | 5.62E-03 | 0.62 |
| Chondroitin Sulfate Biosynthesis                             | ---      | ---  |
| Chronic Myeloid Leukemia Signaling                           | 4.68E-10 | 0.74 |
| Circadian Rhythm Signaling                                   | 6.17E-02 | 0.60 |
| Citrate Cycle                                                | 1.38E-04 | 0.44 |
| Clathrin-mediated Endocytosis Signaling                      | 5.37E-03 | 0.59 |
| Cleavage and Polyadenylation of Pre-mRNA                     | 5.13E-03 | 0.92 |
| CNTF Signaling                                               | 1.05E-06 | 0.80 |
| Coagulation System                                           | 2.29E-03 | 0.71 |
| Colorectal Cancer Metastasis Signaling                       | 1.58E-06 | 0.62 |
| Complement System                                            | 1.74E-05 | 0.83 |
| Corticotropin Releasing Hormone Signaling                    | 3.63E-02 | 0.50 |
| CREB Signaling in Neurons                                    | 4.90E-06 | 0.59 |
| Crosstalk between Dendritic Cells and Natural Killer Cells   | ---      | ---  |
| CTLA4 Signaling in Cytotoxic T Lymphocytes                   | 1.82E-05 | 0.69 |
| CXCR4 Signaling                                              | 5.01E-12 | 0.72 |
| Cyanoamino Acid Metabolism                                   | 1.37E-01 | 0.22 |
| Cyclins and Cell Cycle Regulation                            | 3.98E-07 | 0.71 |
| Cysteine Metabolism                                          | 4.21E-01 | 0.32 |
| Cytotoxic T Lymphocyte-mediated Apoptosis of Target Cells    | ---      | ---  |
| D-arginine and D-ornithine Metabolism                        | 5.24E-01 | 0.06 |
| Death Receptor Signaling                                     | 3.39E-06 | 0.74 |
| Dendritic Cell Maturation                                    | 2.28E-01 | 0.47 |
| D-glutamine and D-glutamate Metabolism                       | ---      | ---  |
| DNA Double-Strand Break Repair by Homologous Recombination   | 1.05E-02 | 0.71 |
| DNA Double-Strand Break Repair by Non-Homologous End Joining | 4.27E-02 | 0.58 |
| DNA Methylation and Transcriptional Repression Signaling     | 1.05E-02 | 0.70 |
| Docosahexaenoic Acid (DHA) Signaling                         | 1.41E-03 | 0.61 |
| Dopamine Receptor Signaling                                  | 1.55E-03 | 0.56 |
| Dopamine-DARPP32 Feedback in cAMP Signaling                  | 2.69E-03 | 0.56 |

|                                                                 |          |      |
|-----------------------------------------------------------------|----------|------|
| EGF Signaling                                                   | 3.98E-06 | 0.75 |
| Eicosanoid Signaling                                            | 2.06E-01 | 0.44 |
| EIF2 Signaling                                                  | 3.98E-21 | 0.78 |
| Endometrial Cancer Signaling                                    | 1.05E-06 | 0.77 |
| Endoplasmic Reticulum Stress Pathway                            | 1.51E-04 | 0.94 |
| Endothelin-1 Signaling                                          | 1.91E-04 | 0.60 |
| Ephrin Receptor Signaling                                       | 7.76E-06 | 0.60 |
| ERK/MAPK Signaling                                              | 3.72E-09 | 0.66 |
| ERK5 Signaling                                                  | 3.63E-02 | 0.63 |
| Erythropoietin Signaling                                        | 8.32E-08 | 0.72 |
| Estrogen Receptor Signaling                                     | 3.16E-12 | 0.77 |
| Estrogen-Dependent Breast Cancer Signaling                      | 9.12E-05 | 0.66 |
| Extrinsic Prothrombin Activation Pathway                        | 5.75E-02 | 0.60 |
| Factors Promoting Cardiogenesis in Vertebrates                  | 6.76E-02 | 0.56 |
| FAK Signaling                                                   | 1.66E-07 | 0.68 |
| Fatty Acid Biosynthesis                                         | 1.58E-02 | 0.18 |
| Fatty Acid Elongation in Mitochondria                           | 4.07E-03 | 0.34 |
| Fatty Acid Metabolism                                           | 5.01E-02 | 0.40 |
| Fc Epsilon RI Signaling                                         | 9.55E-05 | 0.66 |
| Fcγ Receptor-mediated Phagocytosis in Macrophages and Monocytes | 1.58E-07 | 0.72 |
| FcγRIIB Signaling in B Lymphocytes                              | 9.33E-06 | 0.59 |
| FGF Signaling                                                   | 1.02E-02 | 0.61 |
| FLT3 Signaling in Hematopoietic Progenitor Cells                | 1.55E-07 | 0.80 |
| fMLP Signaling in Neutrophils                                   | 1.23E-08 | 0.66 |
| Folate Biosynthesis                                             | ---      | ---  |
| Fructose and Mannose Metabolism                                 | 1.82E-02 | 0.25 |
| FXR/RXR Activation                                              | 8.91E-03 | 0.56 |
| G Beta Gamma Signaling                                          | 2.51E-06 | 0.58 |
| G Protein Signaling Mediated by Tubby                           | 3.47E-03 | 0.62 |
| Galactose Metabolism                                            | 8.91E-04 | 0.32 |
| Gap Junction Signaling                                          | 3.09E-05 | 0.60 |
| Germ Cell-Sertoli Cell Junction Signaling                       | 6.17E-09 | 0.71 |
| Glioblastoma Multiforme Signaling                               | 2.57E-04 | 0.60 |
| Glioma Invasiveness Signaling                                   | 9.77E-05 | 0.73 |
| Glioma Signaling                                                | 7.24E-07 | 0.65 |
| Glucocorticoid Receptor Signaling                               | 2.51E-17 | 0.69 |
| Glutamate Metabolism                                            | 2.14E-03 | 0.38 |
| Glutamate Receptor Signaling                                    | ---      | ---  |
| Glutathione Metabolism                                          | 4.45E-01 | 0.36 |
| Glycerolipid Metabolism                                         | 7.94E-02 | 0.40 |
| Glycerophospholipid Metabolism                                  | 7.76E-04 | 0.45 |
| Glycine, Serine and Threonine Metabolism                        | 8.71E-05 | 0.37 |
| Glycolysis/Gluconeogenesis                                      | 8.91E-04 | 0.46 |
| Glycosaminoglycan Degradation                                   | 6.03E-03 | 0.37 |
| Glycosphingolipid Biosynthesis - Ganglioseries                  | 1.29E-01 | 0.30 |
| Glycosphingolipid Biosynthesis - Globoseries                    | 5.13E-01 | 0.32 |
| Glycosphingolipid Biosynthesis - Lactoseries                    | ---      | ---  |
| Glycosphingolipid Biosynthesis - Neolactoseries                 | 5.13E-01 | 0.20 |
| Glyoxylate and Dicarboxylate Metabolism                         | 6.17E-02 | 0.13 |
| GM-CSF Signaling                                                | 3.47E-06 | 0.75 |

|                                                     |          |      |
|-----------------------------------------------------|----------|------|
| GNRH Signaling                                      | 1.78E-04 | 0.58 |
| G-Protein Coupled Receptor Signaling                | 4.72E-01 | 0.51 |
| Graft-versus-Host Disease Signaling                 | ---      | ---  |
| Granzyme A Signaling                                | 4.03E-01 | 0.55 |
| Granzyme B Signaling                                | 5.01E-04 | 0.94 |
| Growth Hormone Signaling                            | 5.13E-08 | 0.76 |
| Gα 12/13 Signaling                                  | ---      | ---  |
| Gα12/13 Signaling                                   | 4.90E-09 | 0.73 |
| Hepatic Cholestasis                                 | 3.31E-05 | 0.55 |
| Hepatic Fibrosis / Hepatic Stellate Cell Activation | 4.79E-03 | 0.61 |
| HER-2 Signaling in Breast Cancer                    | 2.88E-05 | 0.72 |
| Hereditary Breast Cancer Signaling                  | 3.31E-09 | 0.71 |
| HGF Signaling                                       | 1.48E-07 | 0.73 |
| HIF1α Signaling                                     | 2.14E-04 | 0.67 |
| Histidine Metabolism                                | 4.66E-01 | 0.23 |
| HMGB1 Signaling                                     | 3.02E-08 | 0.75 |
| Human Embryonic Stem Cell Pluripotency              | ---      | ---  |
| Huntington's Disease Signaling                      | 5.01E-11 | 0.68 |
| Hypoxia Signaling in the Cardiovascular System      | 1.00E-03 | 0.71 |
| iCOS-iCOSL Signaling in T Helper Cells              | 3.98E-04 | 0.60 |
| IGF-1 Signaling                                     | 4.68E-07 | 0.71 |
| IL-1 Signaling                                      | 6.76E-06 | 0.65 |
| IL-10 Signaling                                     | 1.48E-02 | 0.58 |
| IL-12 Signaling and Production in Macrophages       | 4.27E-02 | 0.52 |
| IL-15 Production                                    | 3.24E-02 | 0.63 |
| IL-15 Signaling                                     | 1.15E-08 | 0.79 |
| IL-17 Signaling                                     | 4.57E-04 | 0.70 |
| IL-17A Signaling in Airway Cells                    | 2.19E-06 | 0.71 |
| IL-17A Signaling in Fibroblasts                     | 6.76E-03 | 0.65 |
| IL-17A Signaling in Gastric Cells                   | 1.68E-01 | 0.64 |
| IL-2 Signaling                                      | 1.17E-07 | 0.79 |
| IL-22 Signaling                                     | 1.62E-03 | 0.80 |
| IL-3 Signaling                                      | 3.39E-06 | 0.76 |
| IL-4 Signaling                                      | 3.63E-05 | 0.71 |
| IL-6 Signaling                                      | 3.16E-06 | 0.71 |
| IL-8 Signaling                                      | 1.02E-08 | 0.66 |
| IL-9 Signaling                                      | 5.89E-05 | 0.73 |
| ILK Signaling                                       | 6.76E-09 | 0.70 |
| Induction of Apoptosis by HIV1                      | 1.05E-07 | 0.77 |
| Inhibition of Angiogenesis by TSP1                  | 9.77E-03 | 0.64 |
| Inositol Metabolism                                 | 1.33E-01 | 0.28 |
| Inositol Phosphate Metabolism                       | 2.51E-13 | 0.63 |
| Insulin Receptor Signaling                          | 3.98E-07 | 0.69 |
| Integrin Signaling                                  | 6.31E-14 | 0.74 |
| Intrinsic Prothrombin Activation Pathway            | 8.13E-02 | 0.59 |
| JAK/Stat Signaling                                  | 6.31E-08 | 0.81 |
| Keratan Sulfate Biosynthesis                        | 4.27E-01 | 0.53 |
| Leptin Signaling in Obesity                         | 4.47E-06 | 0.69 |
| Leukocyte Extravasation Signaling                   | 3.16E-08 | 0.69 |
| Lipid Antigen Presentation by CD1                   | ---      | ---  |

|                                                      |          |      |
|------------------------------------------------------|----------|------|
| LPS/IL-1 Mediated Inhibition of RXR Function         | 2.24E-02 | 0.54 |
| LPS-stimulated MAPK Signaling                        | 3.89E-07 | 0.72 |
| LXR/RXR Activation                                   | 7.41E-02 | 0.53 |
| Lymphotoxin $\beta$ Receptor Signaling               | 7.08E-08 | 0.77 |
| Lysine Biosynthesis                                  | 5.64E-01 | 0.09 |
| Lysine Degradation                                   | 1.91E-05 | 0.35 |
| Macropinocytosis Signaling                           | 3.63E-05 | 0.68 |
| Maturity Onset Diabetes of Young (MODY) Signaling    | ---      | ---  |
| Mechanisms of Viral Exit from Host Cells             | 9.55E-04 | 0.69 |
| Melanocyte Development and Pigmentation Signaling    | 1.29E-06 | 0.72 |
| Melanoma Signaling                                   | 5.62E-06 | 0.78 |
| Melatonin Signaling                                  | 5.01E-03 | 0.61 |
| Methane Metabolism                                   | 3.80E-02 | 0.19 |
| Methionine Metabolism                                | 1.38E-04 | 0.32 |
| MIF Regulation of Innate Immunity                    | 4.98E-01 | 0.44 |
| MIF-mediated Glucocorticoid Regulation               | ---      | ---  |
| Mismatch Repair in Eukaryotes                        | 3.16E-05 | 0.67 |
| Mitochondrial Dysfunction                            | 1.00E-15 | 0.65 |
| Mitotic Roles of Polo-Like Kinase                    | 8.51E-07 | 0.79 |
| Molecular Mechanisms of Cancer                       | 6.31E-16 | 0.66 |
| MSP-RON Signaling Pathway                            | 9.55E-02 | 0.57 |
| mTOR Signaling                                       | 2.51E-16 | 0.74 |
| Myc Mediated Apoptosis Signaling                     | 1.26E-05 | 0.77 |
| Natural Killer Cell Signaling                        | 2.34E-02 | 0.59 |
| Neuregulin Signaling                                 | 3.72E-06 | 0.66 |
| Neuropathic Pain Signaling In Dorsal Horn Neurons    | 3.72E-02 | 0.57 |
| Neuroprotective Role of THOP1 in Alzheimer's Disease | 4.33E-01 | 0.41 |
| Neurotrophin/TRK Signaling                           | 2.75E-03 | 0.62 |
| NF- $\kappa$ B Activation by Viruses                 | 4.57E-09 | 0.76 |
| NF- $\kappa$ B Signaling                             | 1.55E-05 | 0.65 |
| NGF Signaling                                        | 7.94E-11 | 0.74 |
| N-Glycan Biosynthesis                                | 6.31E-04 | 0.41 |
| N-Glycan Degradation                                 | 4.47E-02 | 0.70 |
| Nicotinate and Nicotinamide Metabolism               | 6.46E-07 | 0.56 |
| Nitric Oxide Signaling in the Cardiovascular System  | 5.37E-02 | 0.49 |
| Nitrogen Metabolism                                  | 4.16E-01 | 0.17 |
| Non-Small Cell Lung Cancer Signaling                 | 3.47E-06 | 0.66 |
| Notch Signaling                                      | 3.03E-01 | 0.51 |
| NRF2-mediated Oxidative Stress Response              | 8.51E-10 | 0.70 |
| Nucleotide Excision Repair Pathway                   | 6.03E-06 | 0.89 |
| Nucleotide Sugars Metabolism                         | 4.68E-02 | 0.11 |
| Nur77 Signaling in T Lymphocytes                     | 5.35E-01 | 0.46 |
| O-Glycan Biosynthesis                                | 2.08E-01 | 0.42 |
| Oncostatin M Signaling                               | 1.02E-05 | 0.86 |
| One Carbon Pool by Folate                            | 6.17E-02 | 0.41 |
| Ovarian Cancer Signaling                             | 5.01E-02 | 0.56 |
| OX40 Signaling Pathway                               | ---      | ---  |
| Oxidative Phosphorylation                            | 6.31E-12 | 0.72 |
| P2Y Purigenic Receptor Signaling Pathway             | 2.24E-08 | 0.66 |
| p38 MAPK Signaling                                   | 1.22E-01 | 0.59 |

|                                                                       |          |      |
|-----------------------------------------------------------------------|----------|------|
| p53 Signaling                                                         | 5.25E-07 | 0.75 |
| p70S6K Signaling                                                      | 1.00E-08 | 0.71 |
| PAK Signaling                                                         | 1.91E-08 | 0.67 |
| Pancreatic Adenocarcinoma Signaling                                   | 8.13E-07 | 0.67 |
| Pantothenate and CoA Biosynthesis                                     | 2.24E-02 | 0.25 |
| Parkinson's Signaling                                                 | 4.89E-01 | 0.56 |
| Paxillin Signaling                                                    | 2.09E-07 | 0.70 |
| PDGF Signaling                                                        | 9.33E-07 | 0.72 |
| Pentose and Glucuronate Interconversions                              | 3.80E-02 | 0.20 |
| Pentose Phosphate Pathway                                             | 7.94E-07 | 0.36 |
| Phenylalanine Metabolism                                              | 3.03E-01 | 0.20 |
| Phenylalanine, Tyrosine and Tryptophan Biosynthesis                   | 3.80E-02 | 0.19 |
| Phospholipase C Signaling                                             | 1.78E-08 | 0.63 |
| Phospholipid Degradation                                              | 6.46E-02 | 0.51 |
| Phototransduction Pathway                                             | ---      | ---  |
| PI3K Signaling in B Lymphocytes                                       | 4.57E-07 | 0.67 |
| PI3K/AKT Signaling                                                    | 1.10E-10 | 0.69 |
| PKC $\theta$ Signaling in T Lymphocytes                               | 5.75E-05 | 0.57 |
| Polyamine Regulation in Colon Cancer                                  | 4.27E-02 | 0.55 |
| PPAR Signaling                                                        | 7.94E-04 | 0.62 |
| PPAR $\alpha$ /RXR $\alpha$ Activation                                | 1.12E-09 | 0.68 |
| Primary Immunodeficiency Signaling                                    | 2.26E-01 | 0.49 |
| Production of Nitric Oxide and Reactive Oxygen Species in Macrophages | 3.72E-07 | 0.60 |
| Prolactin Signaling                                                   | 1.45E-06 | 0.73 |
| Propanoate Metabolism                                                 | 9.77E-05 | 0.36 |
| Prostate Cancer Signaling                                             | 6.03E-07 | 0.66 |
| Protein Kinase A Signaling                                            | 8.51E-09 | 0.64 |
| Protein Ubiquitination Pathway                                        | 7.94E-20 | 0.76 |
| PTEN Signaling                                                        | 4.07E-08 | 0.68 |
| Purine Metabolism                                                     | 7.94E-23 | 0.55 |
| PXR/RXR Activation                                                    | 6.17E-02 | 0.48 |
| Pyrimidine Metabolism                                                 | 7.94E-11 | 0.51 |
| Pyruvate Metabolism                                                   | 1.38E-03 | 0.35 |
| Rac Signaling                                                         | 5.37E-09 | 0.68 |
| RAN Signaling                                                         | 3.16E-05 | 0.70 |
| RANK Signaling in Osteoclasts                                         | 1.82E-06 | 0.71 |
| RAR Activation                                                        | 1.38E-10 | 0.70 |
| Reelin Signaling in Neurons                                           | 1.02E-04 | 0.71 |
| Regulation of Actin-based Motility by Rho                             | 4.57E-05 | 0.68 |
| Regulation of eIF4 and p70S6K Signaling                               | 1.58E-23 | 0.77 |
| Regulation of IL-2 Expression in Activated and Anergic T Lymphocytes  | 1.35E-05 | 0.67 |
| Relaxin Signaling                                                     | 6.46E-07 | 0.62 |
| Renal Cell Carcinoma Signaling                                        | 5.13E-06 | 0.74 |
| Renin-Angiotensin Signaling                                           | 7.94E-09 | 0.68 |
| Retinoic acid Mediated Apoptosis Signaling                            | ---      | ---  |
| Retinol Metabolism                                                    | 2.45E-02 | 0.49 |
| RhoA Signaling                                                        | 3.89E-08 | 0.75 |
| RhoGDI Signaling                                                      | 9.12E-09 | 0.64 |
| Riboflavin Metabolism                                                 | 3.25E-01 | 0.25 |
| Role of BRCA1 in DNA Damage Response                                  | 3.24E-06 | 0.75 |

|                                                                                |          |      |
|--------------------------------------------------------------------------------|----------|------|
| Role of CHK Proteins in Cell Cycle Checkpoint Control                          | 1.74E-05 | 0.83 |
| Role of Hypercytokinemia/hyperchemokine in the Pathogenesis of Influenza       | ---      | ---  |
| Role of IL-17A in Arthritis                                                    | 2.29E-03 | 0.62 |
| Role of IL-17A in Psoriasis                                                    | ---      | ---  |
| Role of IL-17F in Allergic Inflammatory Airway Diseases                        | 6.31E-02 | 0.61 |
| Role of JAK family kinases in IL-6-type Cytokine Signaling                     | 1.91E-04 | 0.82 |
| Role of JAK1 and JAK3 in $\gamma$ c Cytokine Signaling                         | 7.59E-03 | 0.63 |
| Role of JAK1, JAK2 and TYK2 in Interferon Signaling                            | 1.15E-01 | 0.59 |
| Role of JAK2 in Hormone-like Cytokine Signaling                                | 7.76E-02 | 0.62 |
| Role of Lipids/Lipid Rafts in the Pathogenesis of Influenza                    | ---      | ---  |
| Role of Macrophages, Fibroblasts and Endothelial Cells in Rheumatoid Arthritis | 1.38E-03 | 0.55 |
| Role of MAPK Signaling in the Pathogenesis of Influenza                        | 4.90E-02 | 0.61 |
| Role of NANOG in Mammalian Embryonic Stem Cell Pluripotency                    | 1.99E-01 | 0.54 |
| Role of NFAT in Cardiac Hypertrophy                                            | 1.29E-07 | 0.62 |
| Role of NFAT in Regulation of the Immune Response                              | 3.72E-06 | 0.60 |
| Role of Oct4 in Mammalian Embryonic Stem Cell Pluripotency                     | 1.91E-01 | 0.60 |
| Role of Osteoblasts, Osteoclasts and Chondrocytes in Rheumatoid Arthritis      | 4.07E-02 | 0.53 |
| Role of Pattern Recognition Receptors in Recognition of Bacteria and Viruses   | 1.82E-03 | 0.62 |
| Role of PI3K/AKT Signaling in the Pathogenesis of Influenza                    | 2.72E-01 | 0.50 |
| Role of PKR in Interferon Induction and Antiviral Response                     | 1.51E-05 | 0.74 |
| Role of RIG1-like Receptors in Antiviral Innate Immunity                       | 2.30E-01 | 0.53 |
| Role of Tissue Factor in Cancer                                                | 2.29E-09 | 0.76 |
| Role of Wnt/GSK-3 $\beta$ Signaling in the Pathogenesis of Influenza           | ---      | ---  |
| SAPK/JNK Signaling                                                             | 2.34E-05 | 0.68 |
| Selenoamino Acid Metabolism                                                    | 3.89E-02 | 0.33 |
| Semaphorin Signaling in Neurons                                                | 1.00E-02 | 0.69 |
| Serotonin Receptor Signaling                                                   | ---      | ---  |
| Sertoli Cell-Sertoli Cell Junction Signaling                                   | 4.47E-06 | 0.62 |
| Signaling by Rho Family GTPases                                                | 1.58E-12 | 0.68 |
| Small Cell Lung Cancer Signaling                                               | 2.40E-07 | 0.65 |
| Sonic Hedgehog Signaling                                                       | 1.08E-01 | 0.58 |
| Sphingolipid Metabolism                                                        | 1.32E-02 | 0.48 |
| Sphingosine-1-phosphate Signaling                                              | 1.66E-07 | 0.69 |
| Spliceosomal Cycle                                                             | ---      | ---  |
| Starch and Sucrose Metabolism                                                  | 3.47E-06 | 0.32 |
| Stilbene, Coumarine and Lignin Biosynthesis                                    | 1.62E-02 | 0.20 |
| Sulfur Metabolism                                                              | 4.98E-01 | 0.19 |
| Synaptic Long Term Depression                                                  | 3.72E-02 | 0.52 |
| Synaptic Long Term Potentiation                                                | 3.72E-02 | 0.56 |
| Synthesis and Degradation of Ketone Bodies                                     | 9.77E-02 | 0.47 |
| Systemic Lupus Erythematosus Signaling                                         | 4.37E-03 | 0.54 |
| T Cell Receptor Signaling                                                      | 3.31E-07 | 0.69 |
| T Helper Cell Differentiation                                                  | ---      | ---  |
| Taurine and Hypotaurine Metabolism                                             | 4.78E-01 | 0.19 |
| Telomerase Signaling                                                           | 2.69E-06 | 0.73 |
| Telomere Extension by Telomerase                                               | 3.72E-01 | 0.53 |
| TGF- $\beta$ Signaling                                                         | 1.32E-02 | 0.61 |
| Thrombin Signaling                                                             | 1.58E-12 | 0.71 |
| Thrombopoietin Signaling                                                       | 1.17E-06 | 0.73 |
| Thyroid Cancer Signaling                                                       | 3.31E-01 | 0.54 |

|                                                      |          |      |
|------------------------------------------------------|----------|------|
| Tight Junction Signaling                             | 1.86E-10 | 0.73 |
| TNFR1 Signaling                                      | 3.02E-05 | 0.74 |
| TNFR2 Signaling                                      | 8.32E-03 | 0.65 |
| Toll-like Receptor Signaling                         | 2.04E-03 | 0.66 |
| TR/RXR Activation                                    | 3.98E-06 | 0.68 |
| TREM1 Signaling                                      | 1.05E-04 | 0.64 |
| Tryptophan Metabolism                                | 8.32E-02 | 0.33 |
| Tumoricidal Function of Hepatic Natural Killer Cells | 3.24E-04 | 0.88 |
| TWEAK Signaling                                      | 9.77E-03 | 0.64 |
| Type I Diabetes Mellitus Signaling                   | 7.08E-04 | 0.61 |
| Type II Diabetes Mellitus Signaling                  | 3.98E-11 | 0.59 |
| Tyrosine Metabolism                                  | 2.62E-01 | 0.21 |
| Ubiquinone Biosynthesis                              | 9.12E-08 | 0.51 |
| Urea Cycle and Metabolism of Amino Groups            | 6.76E-04 | 0.33 |
| Valine, Leucine and Isoleucine Biosynthesis          | 8.91E-03 | 0.24 |
| Valine, Leucine and Isoleucine Degradation           | 5.75E-04 | 0.44 |
| VDR/RXR Activation                                   | 5.33E-01 | 0.51 |
| VEGF Signaling                                       | 5.62E-07 | 0.69 |
| Virus Entry via Endocytic Pathways                   | 4.57E-08 | 0.72 |
| Wnt/ $\beta$ -catenin Signaling                      | ---      | ---  |
| Xenobiotic Metabolism Signaling                      | 7.76E-04 | 0.59 |
| $\alpha$ -Adrenergic Signaling                       | 3.72E-06 | 0.63 |
| $\beta$ -alanine Metabolism                          | 2.14E-02 | 0.34 |
