# Supplementary material for: Deep sequencing for de novo construction of a marine fish (Sparus aurata) transcriptome database with a large coverage of protein-coding transcripts
Source: PubMed Central journal article supplement (PMC3606596; doi:10.1186/1471-2164-14-178), 2013-03-15

# A

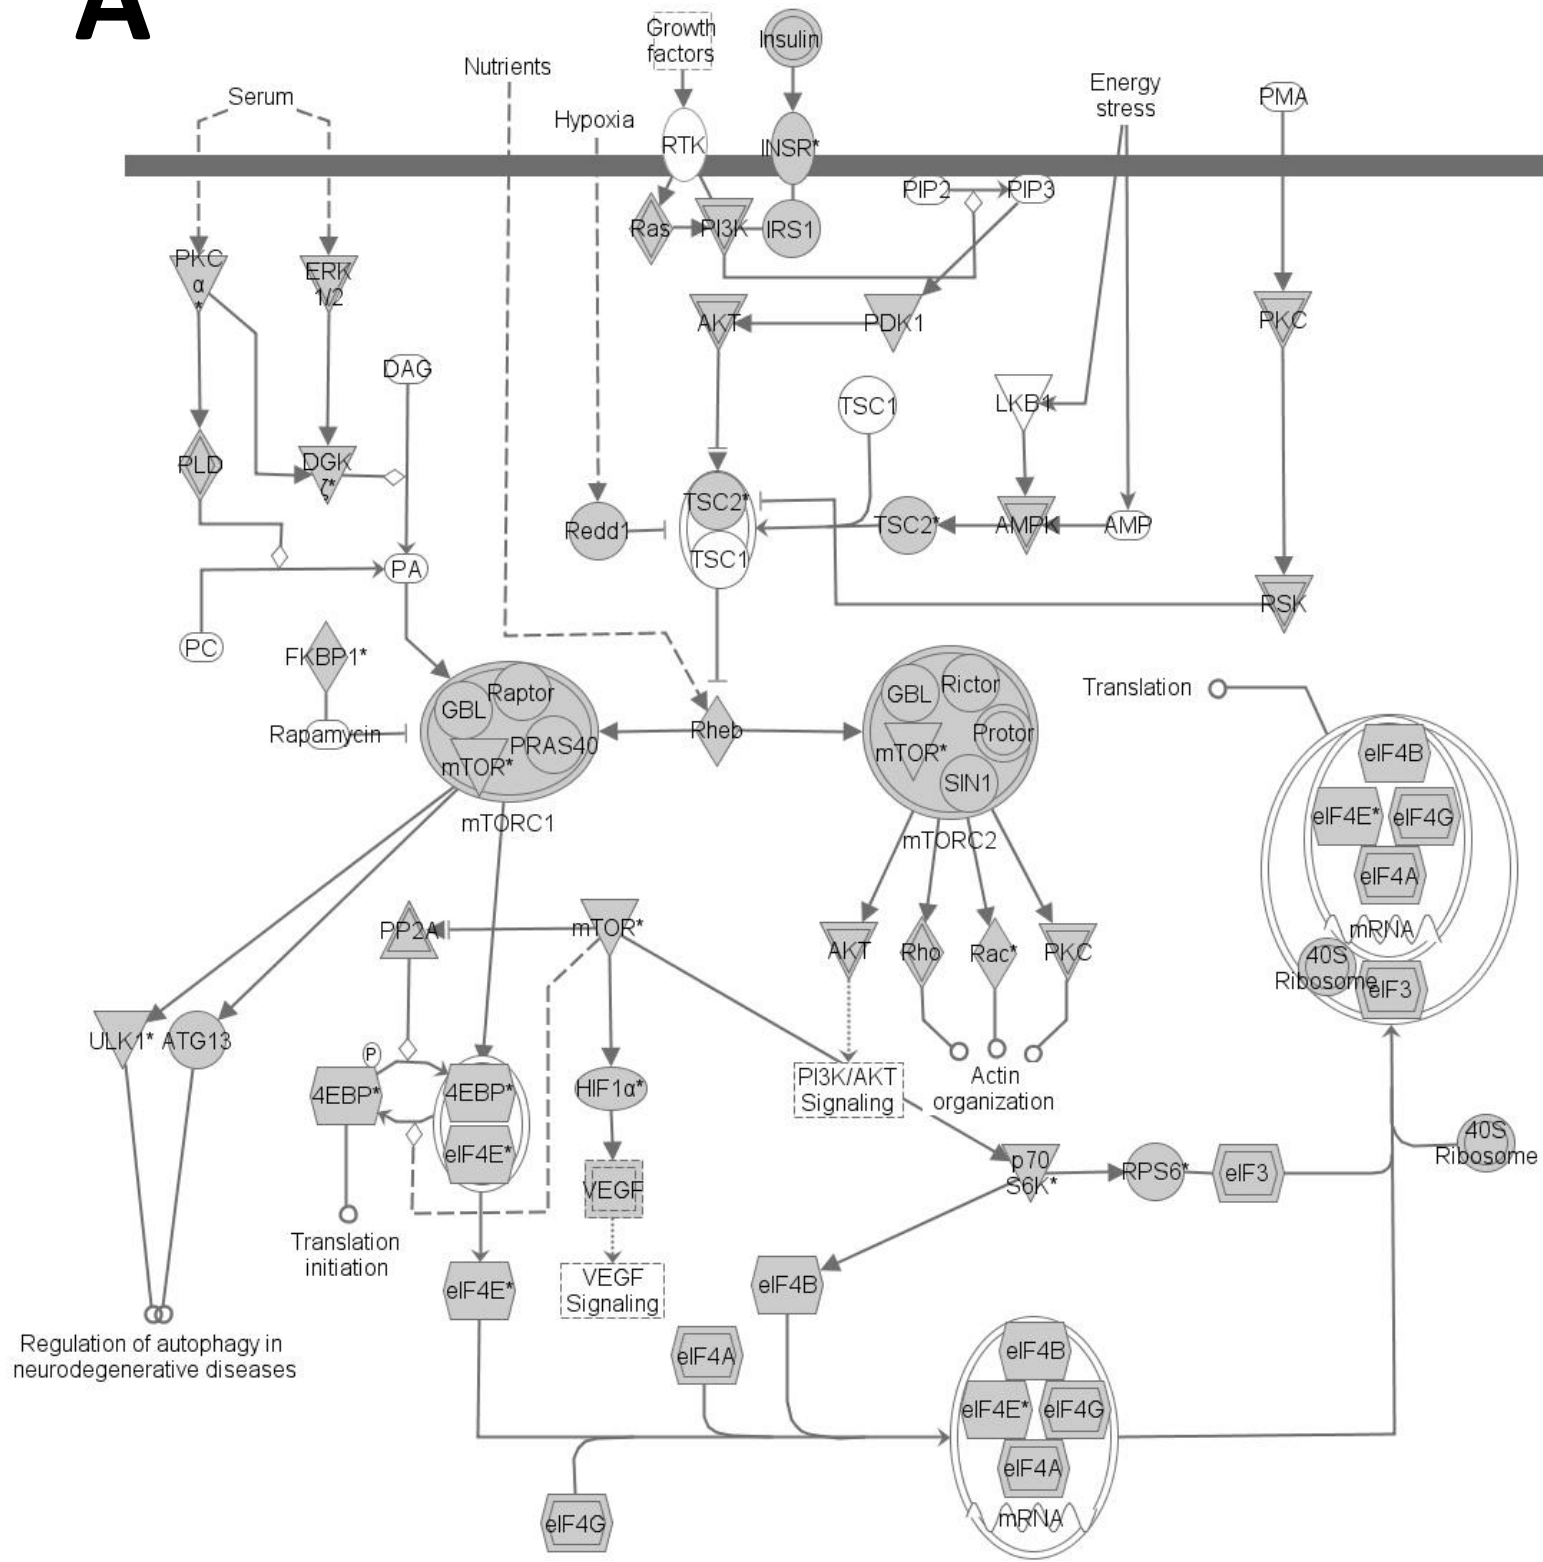

# B

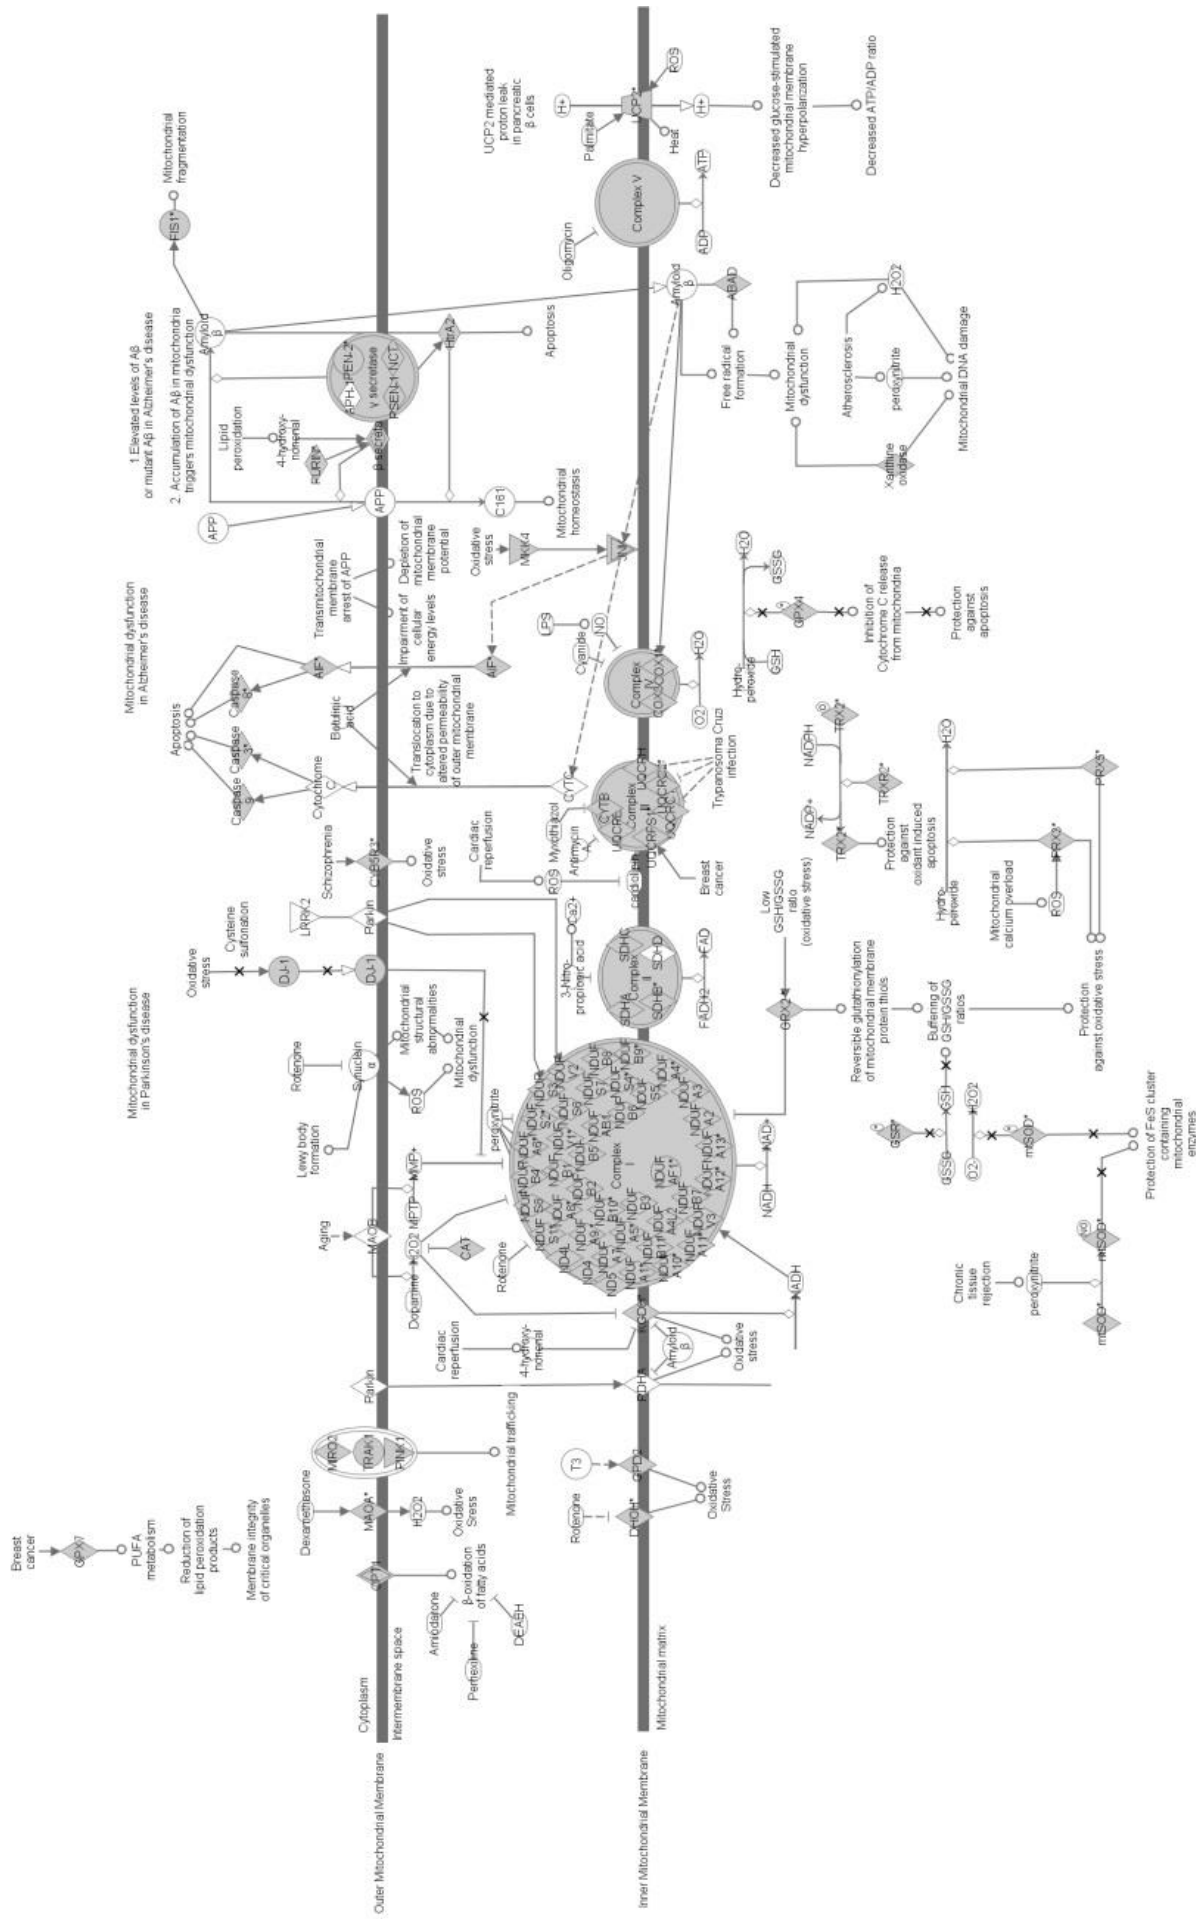

# C

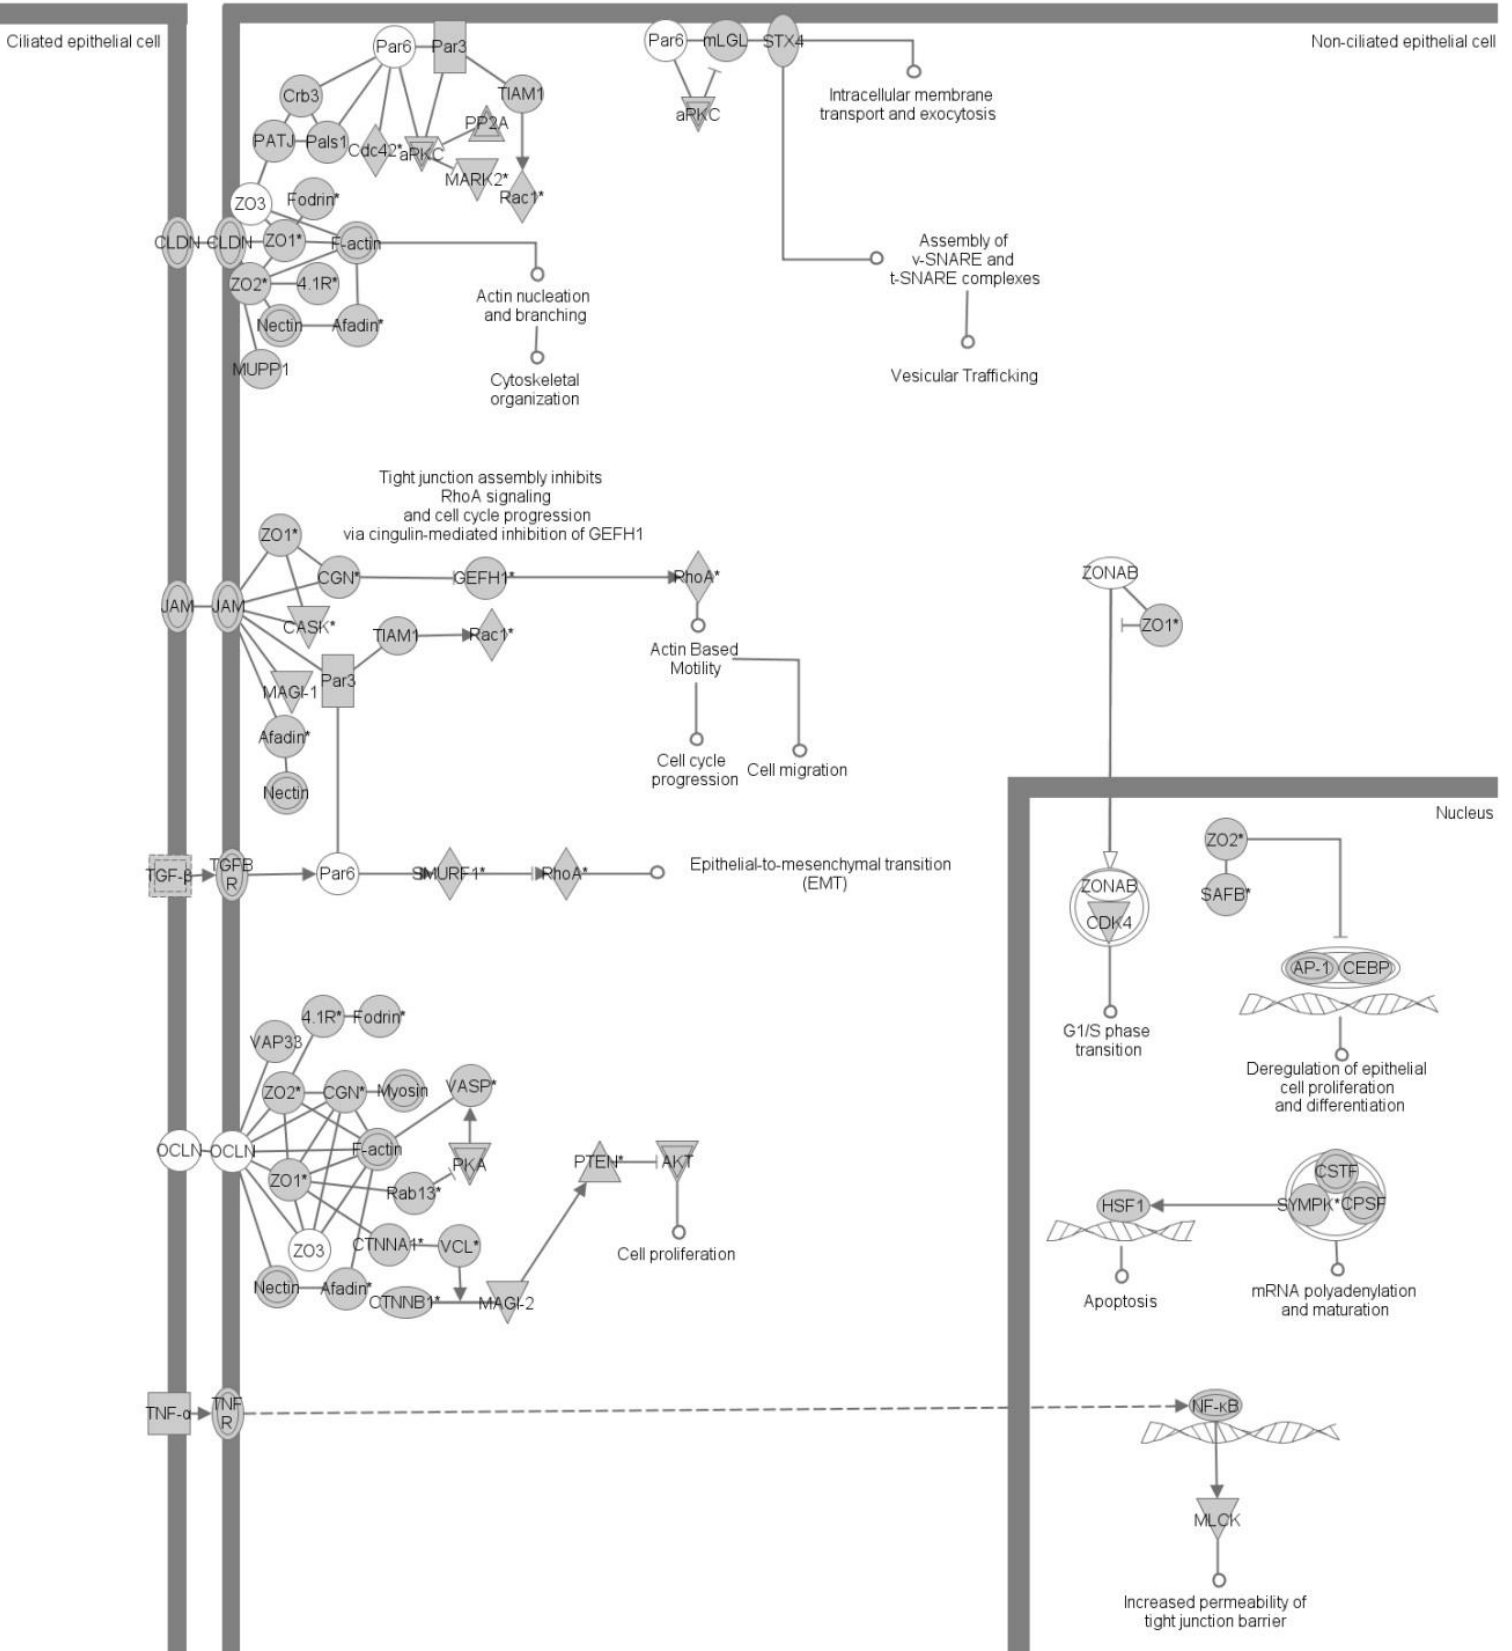

# D

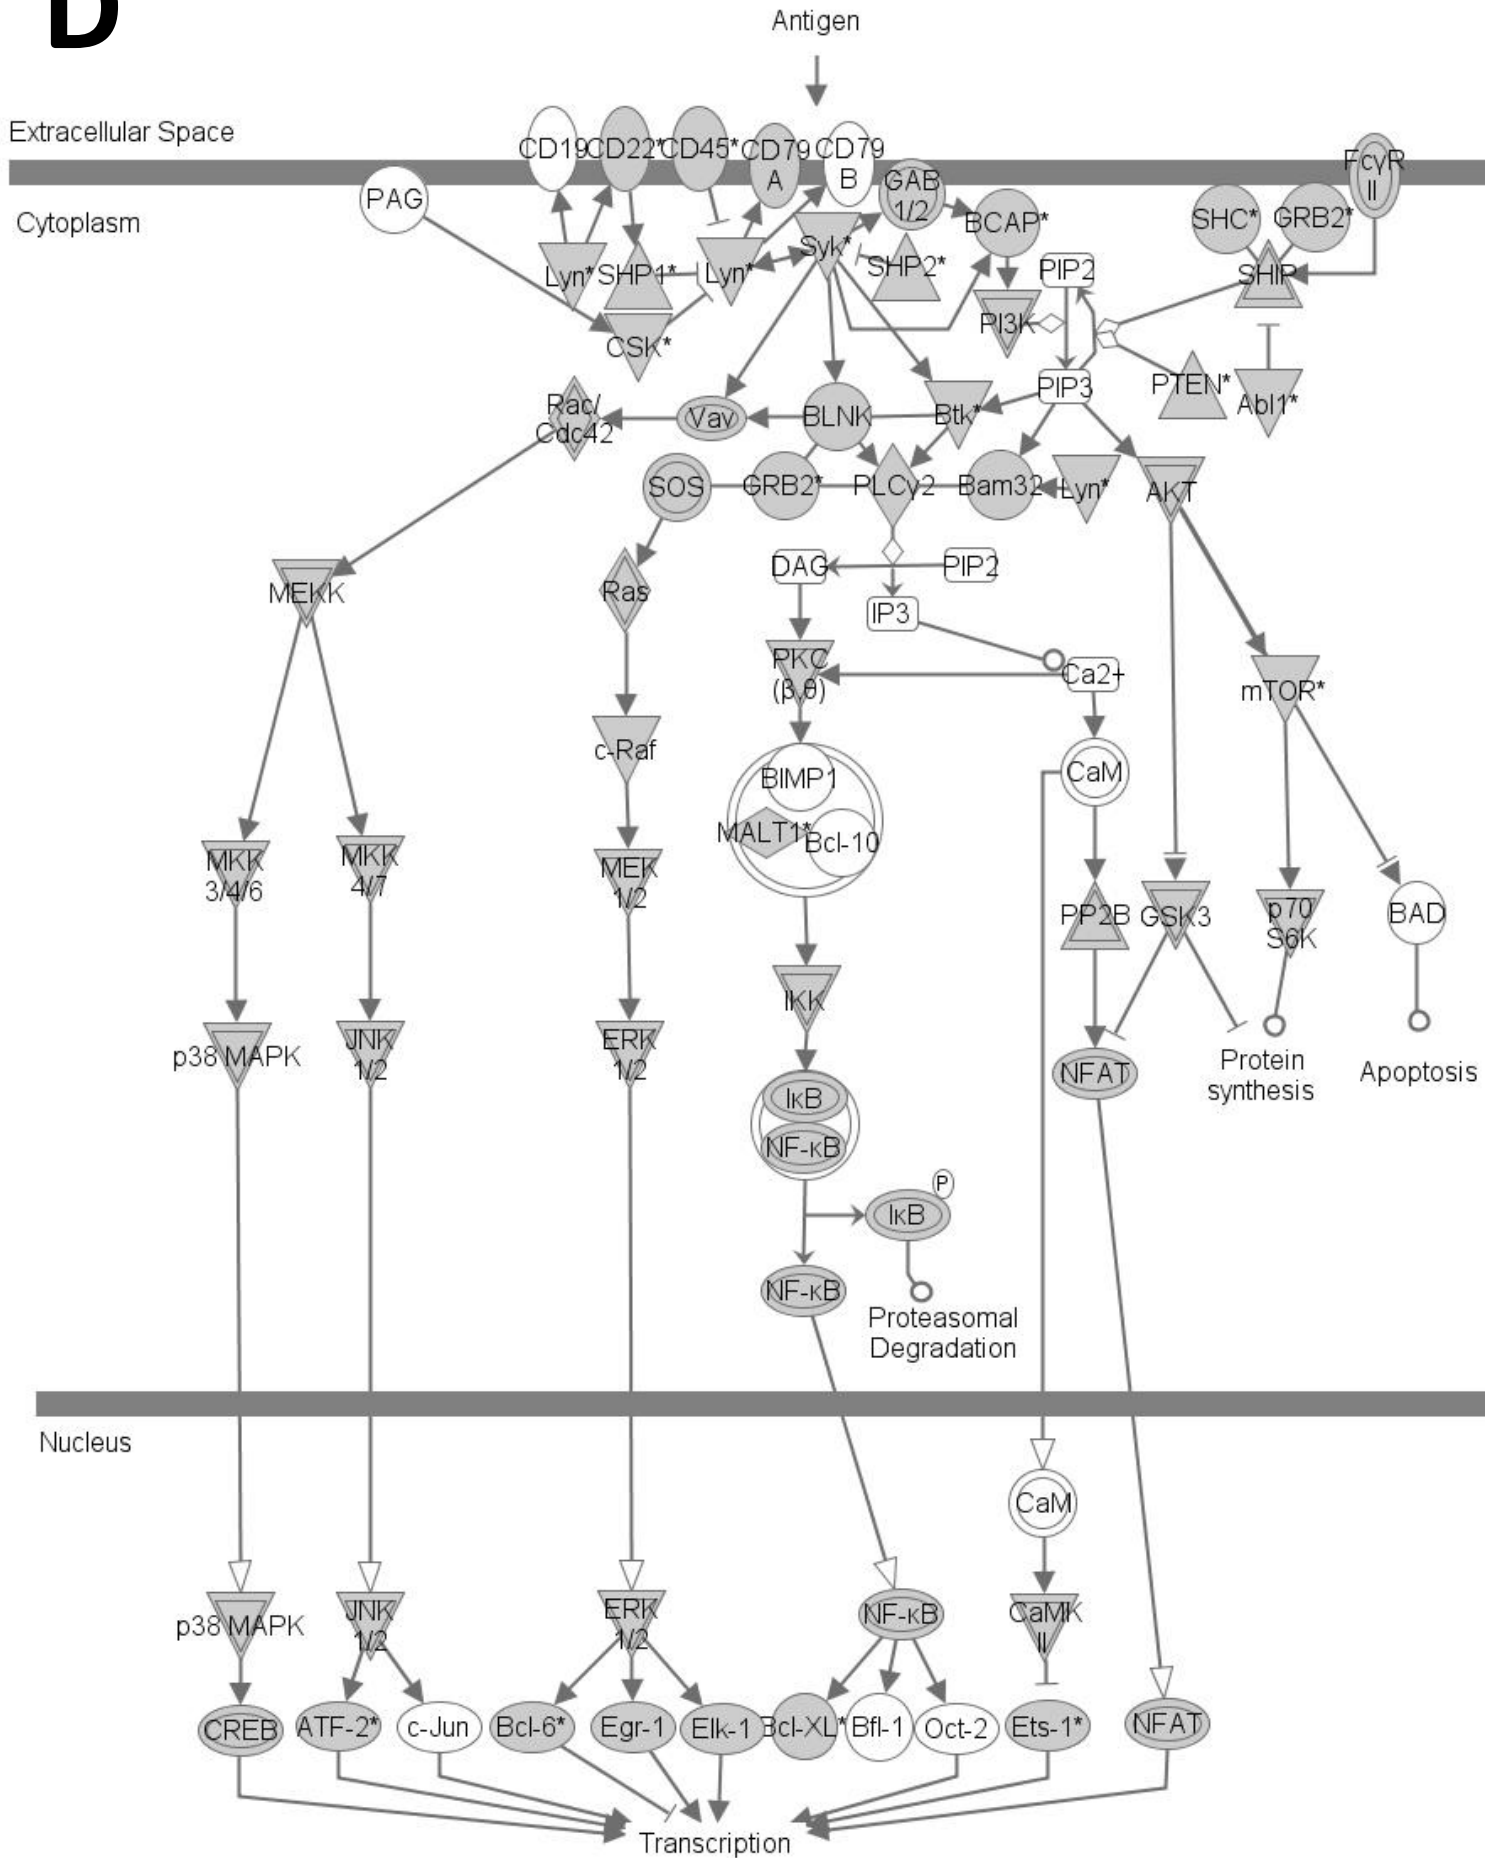

# E

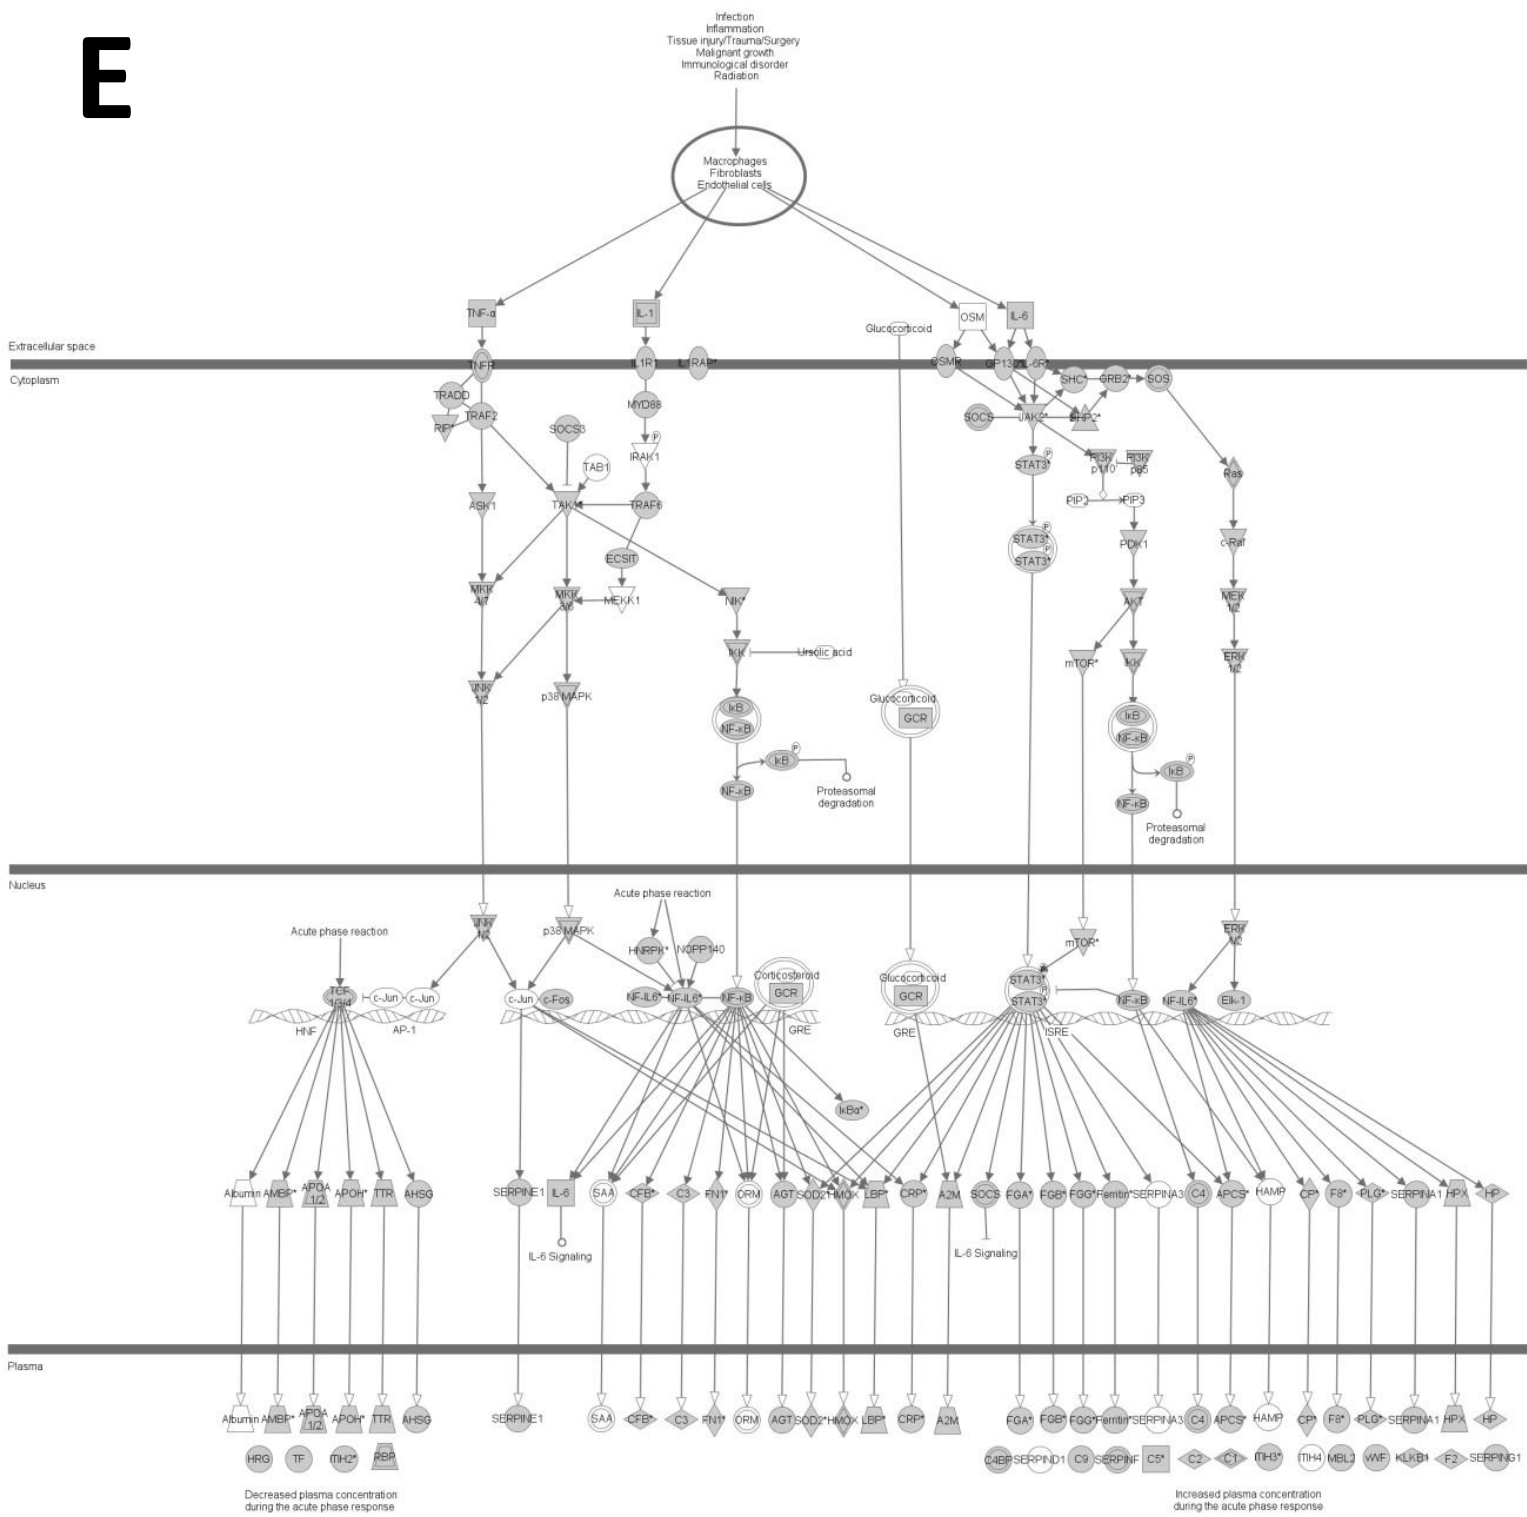

# F

Classical Pathway

Lectin Pathway

Alternate Pathway

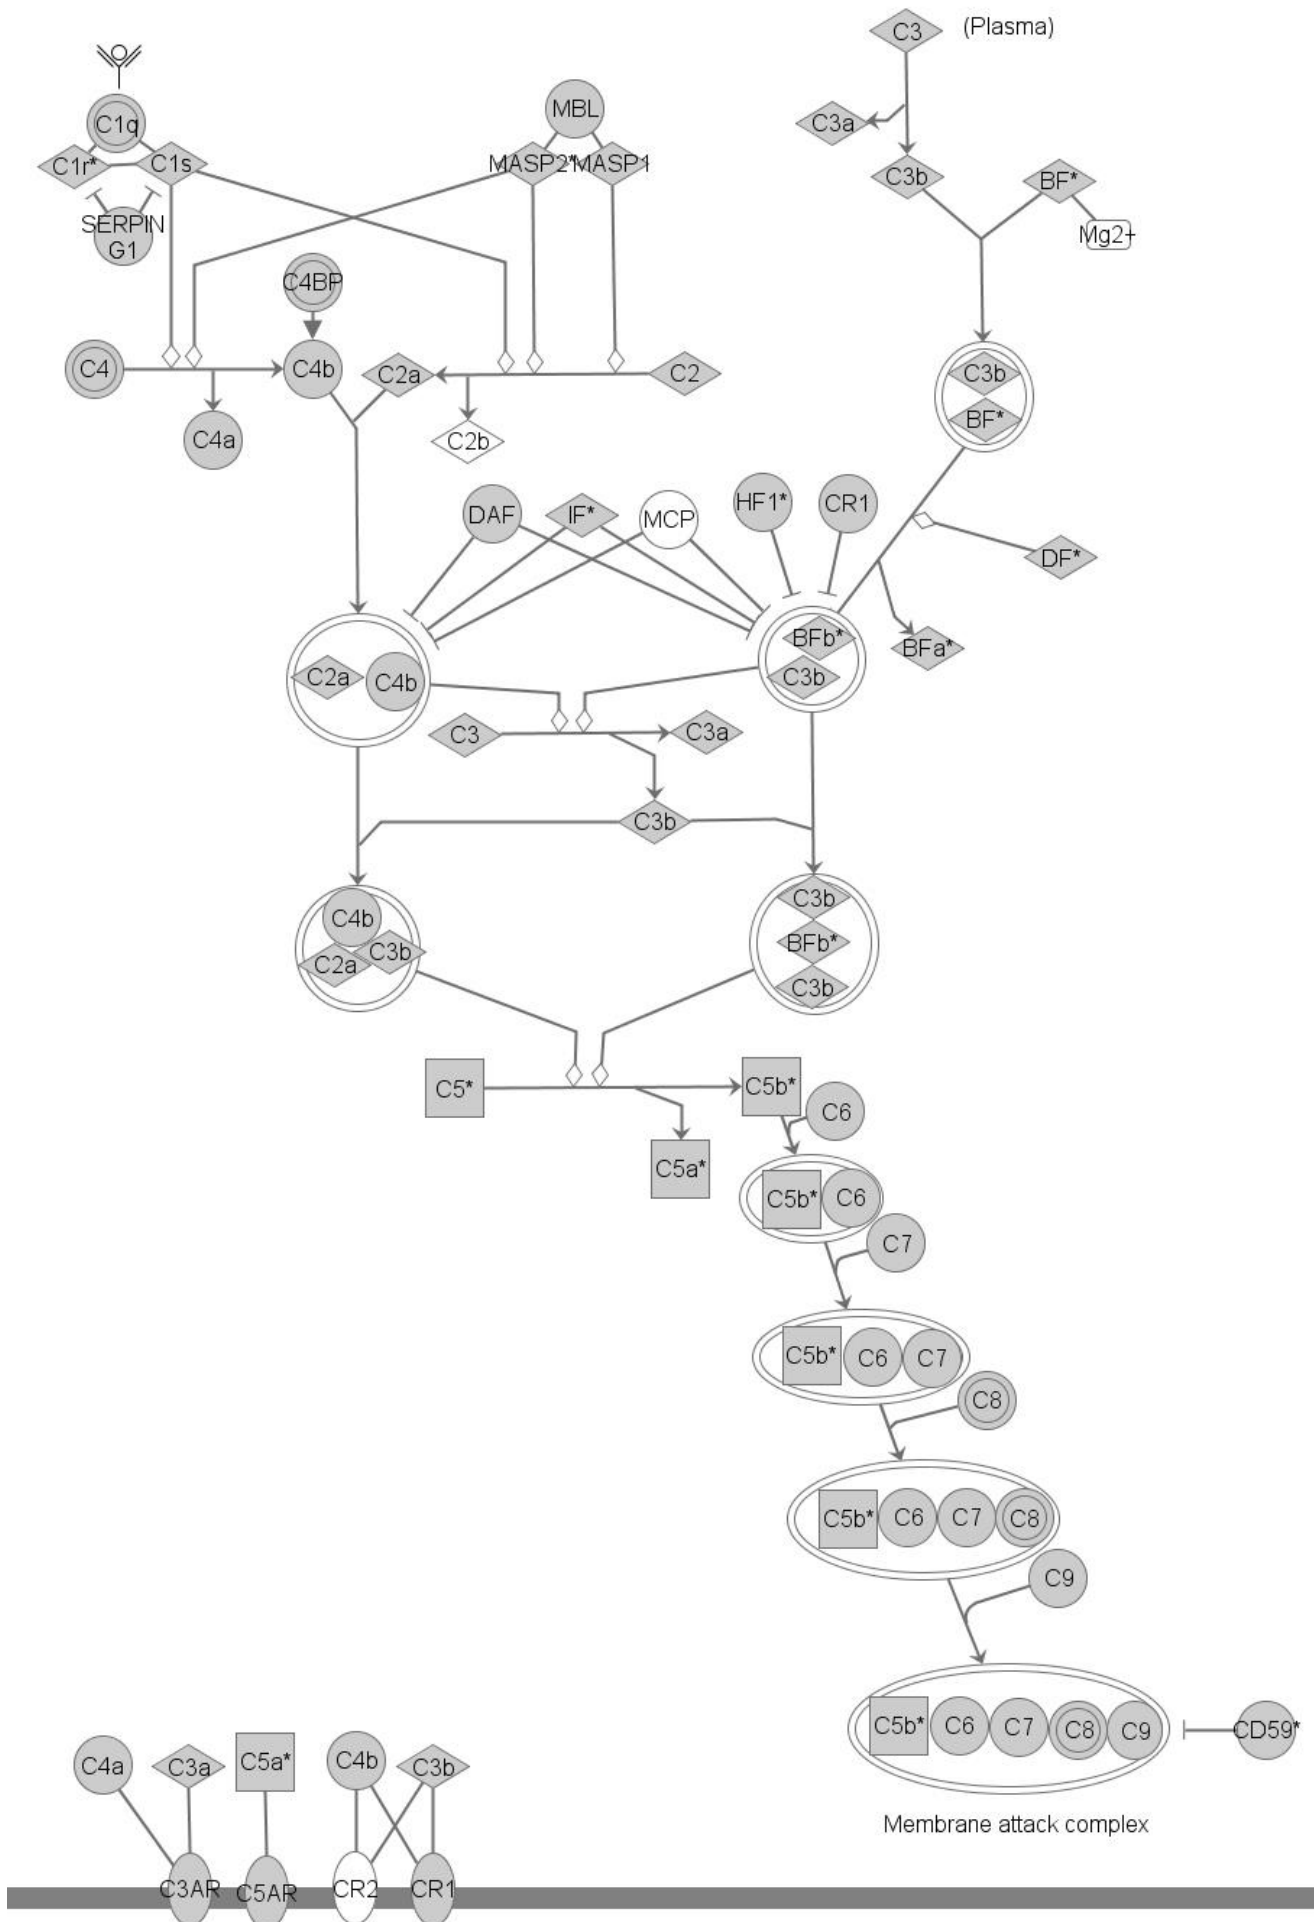

Supplement: 1471-2164-14-178-S2.pdf [file 1471-2164-14-178-S2.pdf]
